# Supplementary material
Source: HighWire-hosted journal article supplement (https://qdcxjkg.com/highwire/filestream/114334/field_highwire_adjunct_files/0/Online_supplementary_Table_2_Echo_Apr_2013.pdf)
Supplement: Online_supplementary_Table_2_Echo_Apr_2013.pdf [file Online_supplementary_Table_2_Echo_Apr_2013.pdf]

| <b>Method/ parameter</b>                              | <b>N</b> | <b>(Mean±SD)</b> |
|-------------------------------------------------------|----------|------------------|
| Left ventricular ejection fraction/Simpson biplan (%) | 18       | 67 ± 11          |
| E/E'                                                  | 17       | 10 ± 4           |
| PV AccT (ms)                                          | 17       | 73 ± 22          |
| LVEI                                                  | 16       | 1.3 ± 0.2        |
| RIMP                                                  | 17       | 0.61 ± 0.44      |
| LA Area (cm <sup>2</sup> )                            | 18       | 18.8 ± 5.4       |
| RA area (cm <sup>2</sup> )                            | 18       | 25.3 ± 7.6       |
| RA/LA                                                 | 18       | 1,4 ± 0,4        |
| LA Vol (ml)                                           | 18       | 57 ± 33          |
| RA Vol (ml)                                           | 18       | 97 ± 57          |
| RA Vol/ LA Vol                                        | 18       | 1.8± 0.6         |
| TAPSE (mm)                                            | 18       | 18 ± 5           |
| E/A                                                   | 14       | 0.9 ± 0.3        |
| D- Time (ms)                                          | 18       | 214 ± 58         |

Online supplementary table 2: Echocardiographic data at baseline.

Values are presented as mean ± SD. E: E-wave of mitral-flow pattern. E ' : E wave of tissue doppler imaging of mitral ring. PV ACCT – acceleration time of right ventricular outflow. LVEI: diastolic left ventricular eccentricity index. RIMP: right ventricular myocardial performance index = Tei-index. LA: left atrium. RA: Right atrium. Vol: volume. TAPSE: Tricuspid annular plane systolic excursion. D-Time: deceleration time of E-wave of mitral flow pattern.
